# Supplementary material for: Dual spectra band emissive Eu2+/Mn2+co-activated alkaline earth phosphates for indoor plant growth novel phosphor converted-LEDs
Source: Royal Society of Chemistry journal article supplement (doi:10.1039/c7cp00742f), 2017-01-01
Supplement: c7cp00742f1.pdf [file c7cp00742f1.pdf]

## Supporting Information

### **Dual spectra band emissive $\text{Eu}^{2+}/\text{Mn}^{2+}$ co-activated alkaline earth phosphates for indoor plant growth novel phosphor converted-LEDs**

Young Jun Yun,<sup>a</sup> Jin Kyu Kim,<sup>b</sup> Ji Young Ju,<sup>b</sup> Seul Ki Choi,<sup>b</sup> Woon Ik Park,<sup>c</sup> Jae Yong Suh,<sup>d</sup> Ha-kyun Jung,<sup>b</sup> Yongseon Kim<sup>\*,†,e</sup> and Sungho Choi<sup>\*,†,b</sup>

<sup>a</sup>Materials & Components Research Institute/Convergence Composite Materials Team, Korea Testing & Research Institute, 98 Gyoyukwon-ro, Gwacheon, Gyeonggi-do, Republic of Korea.

<sup>b</sup>Advanced Battery Materials Research Group, Korea Research Institute of Chemical Technology, 141 Gajeongro, Yuseong, Daejeon, Republic of Korea.

<sup>c</sup>Electronic Convergence Materials Division, Korean Institute of Ceramic Engineering and Technology, 101 Soho-ro, Jinju, Gyeongsangnam-do, Republic of Korea

<sup>d</sup>Department of Physics, Michigan Technological University, Houghton, Michigan 49931, United States

<sup>e</sup>Department of Materials Science and Engineering, Inha University, Incheon, Republic of Korea

\*Corresponding author

Yongseon Kim, E-mail: ys.kim@inha.ac.kr

Sungho Choi, E-mail: shochoi@kriect.re.kr

## 1. Photoluminescence Spectra

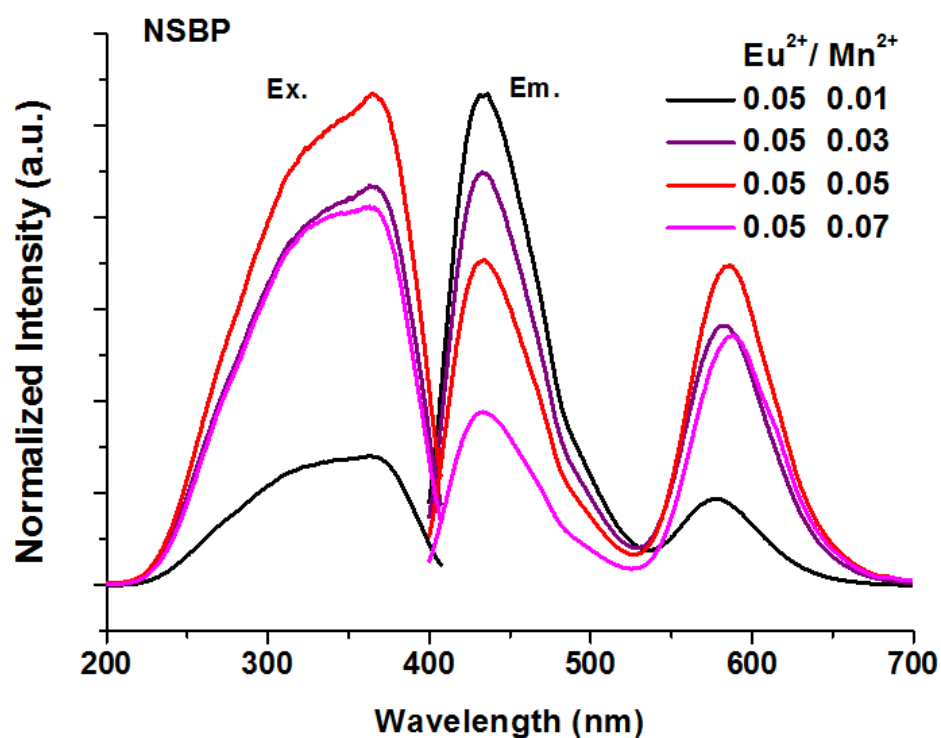

(a)

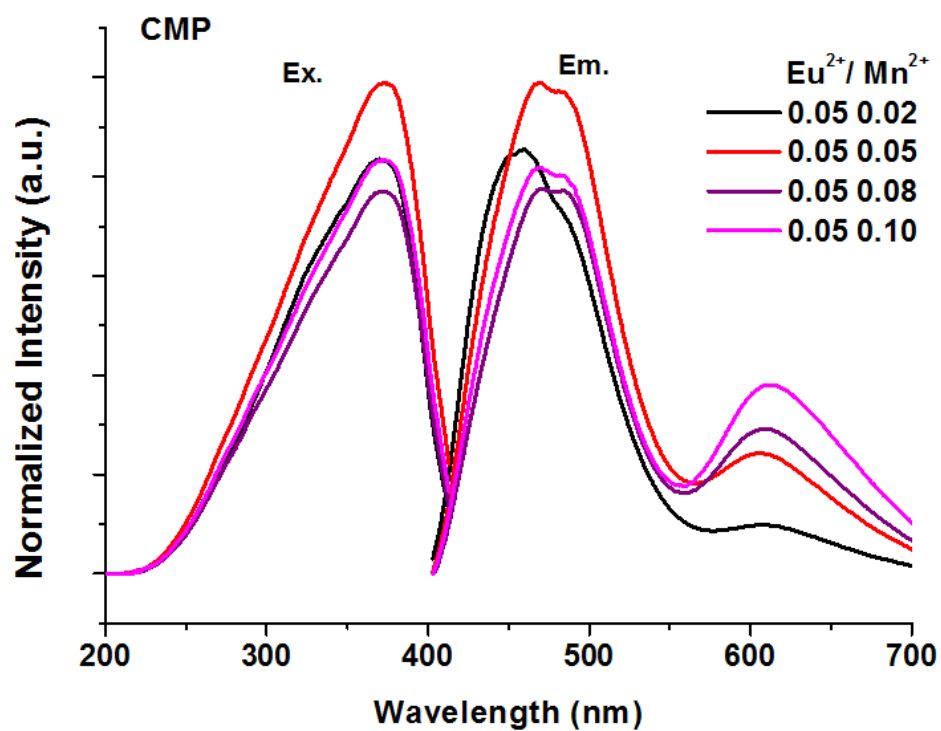

(b)

**Figure S1.** Excitation and emission spectra of  $\text{Eu}^{2+}/\text{Mn}^{2+}$  doped (a)  $\text{Na}(\text{Sr}_{0.5}\text{Ba}_{0.5})\text{PO}_4$  and (b)  $\text{Ca}_3\text{Mg}_3(\text{PO}_4)_4$  phosphors with varying activators concentration ratio.

## 2. Crystal structure

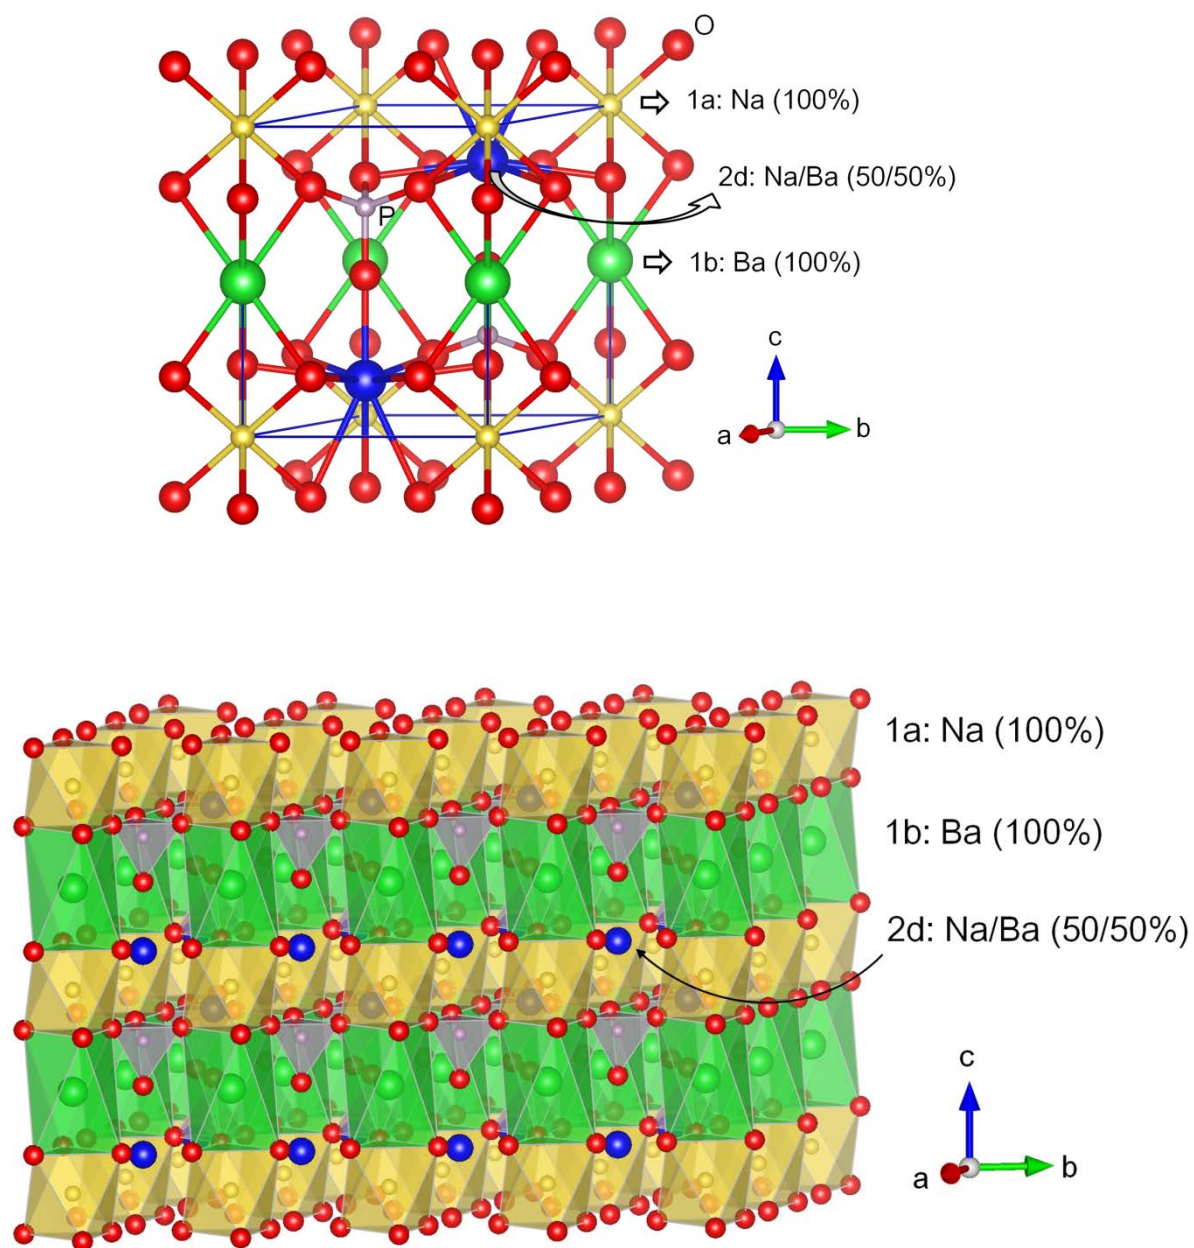

**Figure S2.** Crystal structure of the  $\text{NaBaPO}_4$  compound. The available atomic site, 1a, 1b and 2d, with the Na-O and Ba-O subcell.

### 3. LED-assisted Lighting Effect on Onion Growth

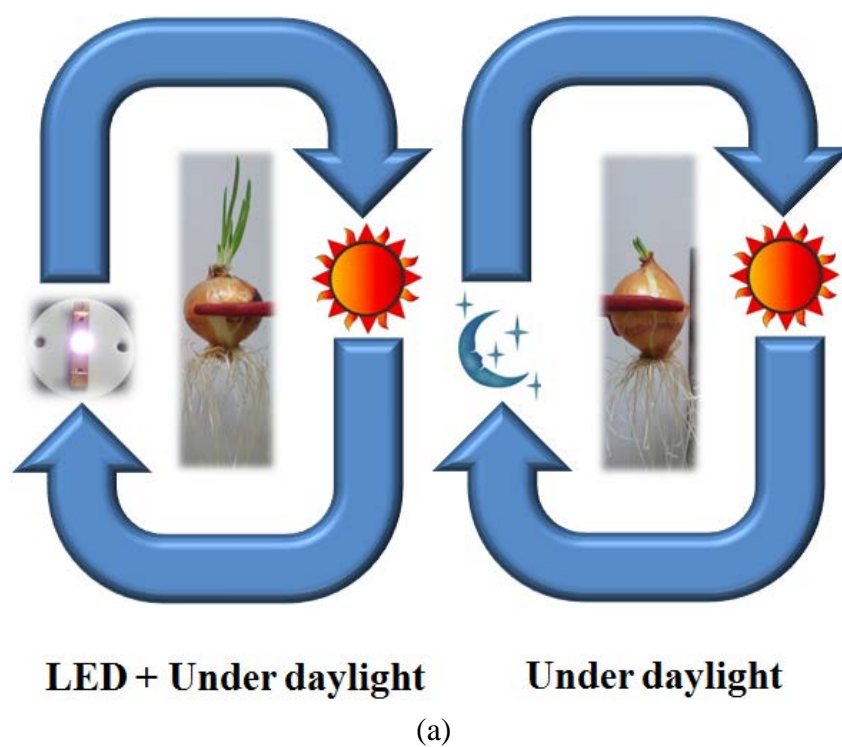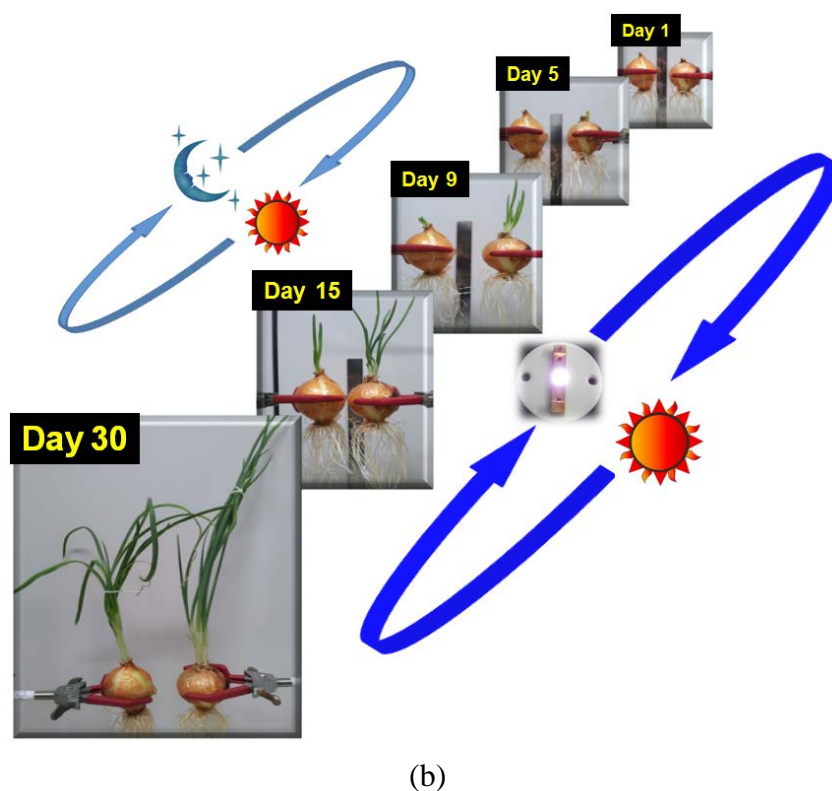

**Figure S3.** (a) Comparison of the grown-up onions under LED-assisted photoperiod and daylight. (b) 30 day panoramic images of shoots of the onions under with (right) and without (left) LED-assisted photoperiod conditions.

#### 4. LED lightings-equipped Plant Factory Apparatus

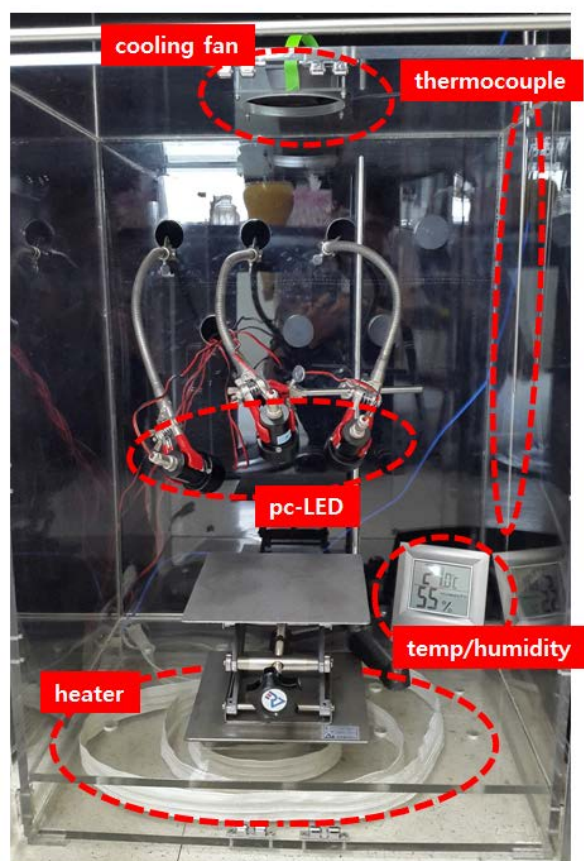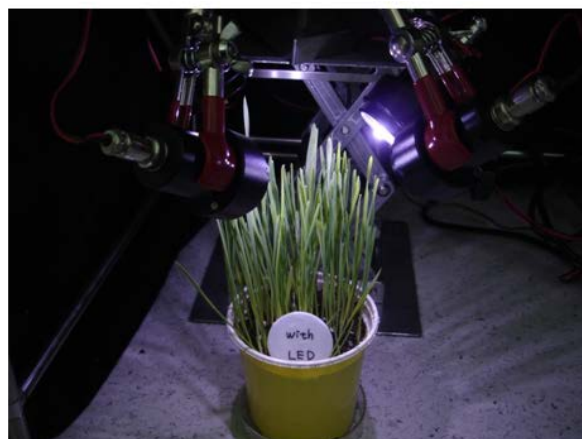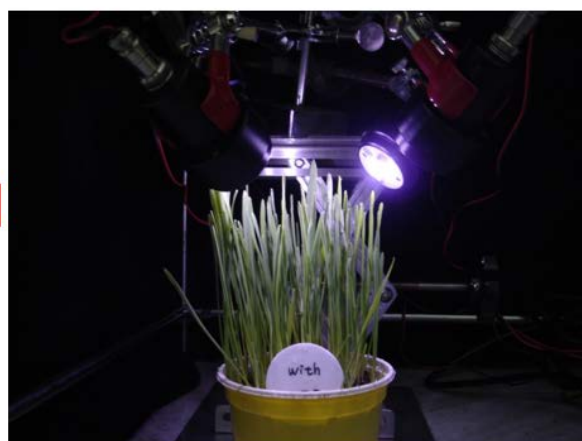

**Figure S4.** Left) Set-up image of the thermo-hygrostat chamber for LED-supported plant growth. Right) *In-situ* image of oats growing-up under LED illumination.



## 5. Pure red-emitting LED assisted Lighting Effect on Oats Growth

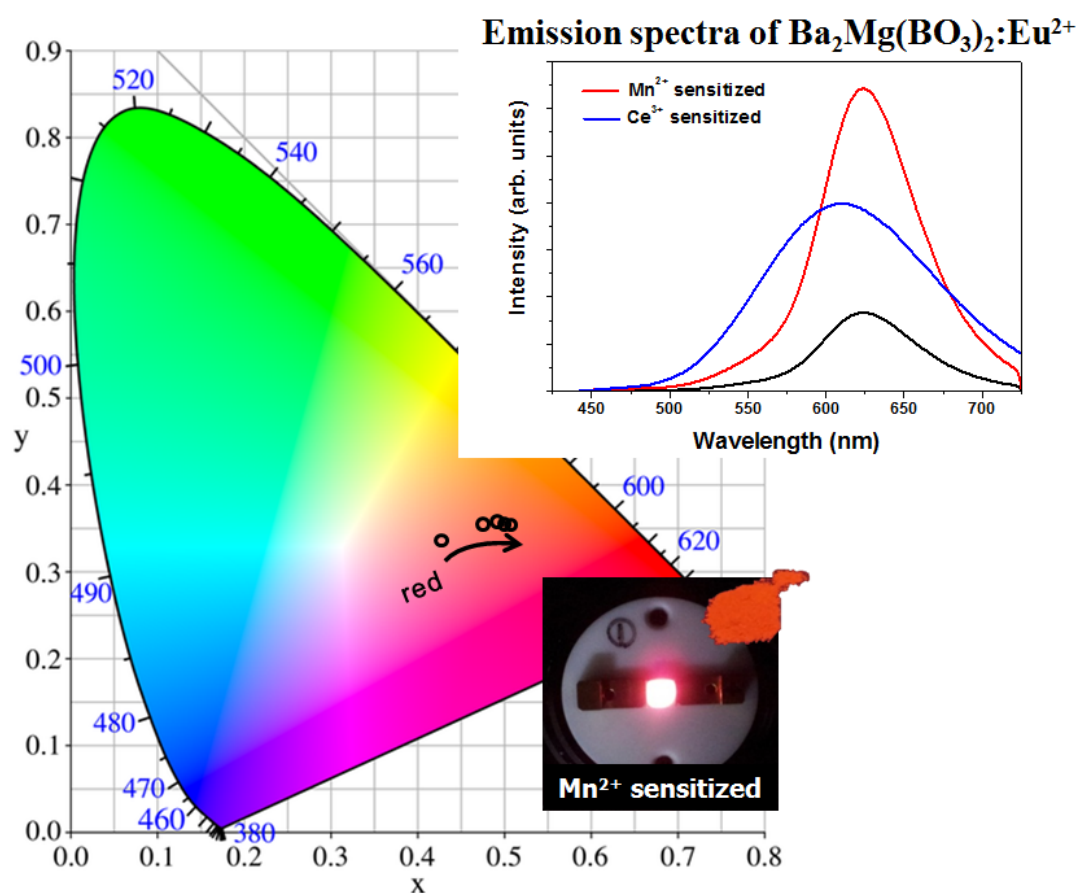

**Figure S5.** Emission spectra, corresponding CIE diagram, and pc-LED image with power on for the red-emitting  $\text{Ba}_2\text{Mg}(\text{BO}_3)_2:\text{Eu}^{2+}$  phosphor.
